# Supplementary material for: Presence of Parabens in Different Children Biological Matrices and Its Relationship with Body Mass Index
Source: MDPI journal article supplement (doi:10.3390/nu15051154), 2023-02-24
Supplement: s1 [file s1]

**Table S1.** Comparison between controls and cases included/not included subjects.

|                                       |            | Cases (n=94)    |                     |                    | Controls (n=137) |                     |                    |
|---------------------------------------|------------|-----------------|---------------------|--------------------|------------------|---------------------|--------------------|
|                                       |            | Included (n=59) | Not included (n=35) | <i>p</i>           | Included (n=101) | Not included (n=36) | <i>p</i>           |
| Gender (%)                            | Male       | 58.3            | 48.6                | 0.398 <sup>a</sup> | 49.5             | 50.0                | 0.999 <sup>a</sup> |
|                                       | Female     | 41.7            | 51.4                |                    | 50.5             | 50.0                |                    |
| Age, categorized (%)                  | ≤ 10 yrs   | 75.0            | 57.1                | 0.108 <sup>a</sup> | 79.2             | 88.6                | 0.312 <sup>a</sup> |
|                                       | > 10 yrs   | 25.0            | 42.9                |                    | 20.8             | 11.4                |                    |
| Weight, kg                            | Median     | 53.30           | 51.20               | 0.758 <sup>b</sup> | 25.45            | 26.60               | 0.813 <sup>b</sup> |
|                                       | IQR        | 21.90           | 25.70               |                    | 12.58            | 10.13               |                    |
| Height, cm                            | Mean       | 140.37          | 141.67              | 0.682 <sup>c</sup> | 127.79           | 126.05              | 0.641 <sup>c</sup> |
|                                       | SD         | 12.93           | 17.81               |                    | 20.68            | 13.60               |                    |
| Energy Intake, kcal day <sup>-1</sup> | Mean       | 2001.08         | 1900.93             | 0.409 <sup>c</sup> | 2011.94          | 1925.31             | 0.574 <sup>c</sup> |
|                                       | SD         | 452.98          | 441.29              |                    | 512.39           | 345.10              |                    |
| Physical Activity (out-of-school) (%) | No         | 38.6            | 44.8                | 0.646 <sup>a</sup> | 41.4             | 38.1                | 0.999 <sup>a</sup> |
|                                       | Yes        | 61.4            | 55.2                |                    | 58.6             | 61.9                |                    |
| Parents' level of education (%)       | Primary    | 7.0             | 0                   | 0.141 <sup>a</sup> | 1.1              | 0                   | 0.882 <sup>a</sup> |
|                                       | Secondary  | 52.6            | 41.4                |                    | 24.7             | 23.8                |                    |
|                                       | University | 40.4            | 58.6                |                    | 74.2             | 76.2                |                    |
| Smoking among parents (%)             | No         | 81.7            | 73.5                | 0.434 <sup>a</sup> | 78.6             | 86.1                | 0.461 <sup>a</sup> |
|                                       | Yes        | 18.3            | 26.5                |                    | 21.4             | 13.9                |                    |
| Marital status parents (%)            | Married    | 77.2            | 65.5                | 0.354 <sup>a</sup> | 92.1             | 76.2                | 0.004 <sup>a</sup> |
|                                       | Divorcee   | 17.5            | 31.0                |                    | 3.4              | 23.8                |                    |
|                                       | Single     | 5.3             | 3.4                 |                    | 4.5              | 0                   |                    |
| Urinary creatinine, g L <sup>-1</sup> | Median     | 0.90            | -                   | -                  | 0.87             | -                   | -                  |
|                                       | IQR        | 0.77            | -                   |                    | 0.60             | -                   |                    |

IQR: interquartile range; SD: standard deviation; *p*-Values < 0.05 are highlighted in bold; <sup>a</sup> Chi-square test; <sup>b</sup> U Mann-Whitney test; <sup>c</sup> Student's *t*-test
